# Supplementary material for: Direct growth of ternary Ni–Fe–P porous nanorods onto nickel foam as a highly active, robust bi-functional electrocatalyst for overall water splitting
Source: Royal Society of Chemistry journal article supplement (doi:10.1039/c6ta10509b), 2017-01-01
Supplement: c6ta10509b1.pdf [file c6ta10509b1.pdf]

# *Supplementary Information*

## **Direct growth of Ternary Ni-Fe-P Porous Nanorods onto nickel foam as a Highly Active, Robust Bi-functional Electrocatalyst for Overall Water Splitting**

*Sung Hoon Ahn and Arumugam Manthiram\**

Materials Science and Engineering Program & Texas Materials Institute

The University of Texas at Austin, Austin, Texas, 78712, United States

Corresponding Author

E-mail: manth@austin.utexas.edu

### **Experimental Section**

#### **Preparation of MOF-derived porous Ni-Fe-P nanorods**

*Synthesis of Ni<sub>0.7</sub>Fe<sub>0.3</sub> oxyhydroxide nanoflakes on nickel foam:* The commercial nickel foam was successively cleaned with ethanol, acetone, and ethanol for 30 min each. The growth solution was prepared by dissolving 0.07 M nickel nitrate hexahydrate, 0.03 M Iron(III) nitrate nonahydrate, and 0.25 M urea in 20 mL of deionized water. Four pieces of nickel foam (1 X 4 cm) were submersed in the above solution, and Ni<sub>0.7</sub>Fe<sub>0.3</sub> oxyhydroxide nanoflakes (NiFe NFs) were directly grown onto the commercial nickel foam at 100 °C for 3 h in an electric oven. The resulting NiFe NFs were washed with ethanol twice and dried in a vacuum oven at 50 °C overnight.

*Synthesis of Ni-Fe MOF nanorods on nickel foam:* 400 mg of 2,5-Dihydroxyterephthalic acid(H4DOBDC) was dissolved in 80 mL dimethylformamide(DMF), and the resulting solution was transferred into a 100-mL Teflon-lined stainless-steel autoclave. 10 pieces of the NiFe NFs on the nickel foam were submersed into the above solution, heated at 155 °C for 12 h in an electric oven, and then cooled down to room temperature naturally. The resulting Ni-Fe MOF nanorods (Ni-Fe MOF-NRs) were washed with ethanol twice and dried in a vacuum oven at 50 °C overnight.

*Synthesis of Ni-Fe-P porous nanorods on nickel foam:* Ni-Fe MOF NRs on nickel foam were loaded onto a graphite box and then placed into tubular furnace. 1 g of sodium hypophosphite monohydrate ( $\text{NaH}_2\text{PO}_2$ ) was loaded onto a graphite box placed on the upstream side of the argon flow in the tubular furnace. The Ni-Fe-P porous nanorods (Ni-Fe-P porous NRs) on nickel foam were obtained after phosphidation at 300 °C for 1 h with a ramping rate of 5 °C  $\text{min}^{-1}$  under argon flow.

*Synthesis of  $\text{Ni}_{0.3}\text{Fe}_{0.7}$  oxyhydroxide nanoflakes on nickel foam:* The same procedure with  $\text{Ni}_{0.7}\text{Fe}_{0.3}$  oxyhydroxide nanoflakes was conducted except for the preparation of the growth solution. The growth solution for  $\text{Ni}_{0.3}\text{Fe}_{0.7}$  oxyhydroxide nanoflakes was prepared by dissolving 0.03 M nickel nitrate hexahydrate, 0.07 M Iron(III) nitrate nonahydrate, and 0.25 M urea in 20 mL of deionized water.

*Synthesis of Ni oxyhydroxide nanoflakes on nickel foam:* The same procedure with  $\text{Ni}_{0.7}\text{Fe}_{0.3}$  oxyhydroxide nanoflakes was conducted except for the preparation of the growth solution. The growth solution for Ni oxyhydroxide nanoflakes was prepared by dissolving 0.1 M nickel nitrate hexahydrate and 0.25 M urea in 20 mL of deionized water.

*Synthesis of NiCo oxyhydroxide nanoflakes on nickel foam:* The same procedure with  $\text{Ni}_{0.7}\text{Fe}_{0.3}$  oxyhydroxide nanoflakes was conducted except for the preparation of the growth solution. The growth solution for  $\text{Ni}_{0.7}\text{Co}_{0.3}$  oxyhydroxide nanoflakes was prepared by dissolving 0.07 M nickel nitrate hexahydrate, 0.03 M Cobalt(II) nitrate hexahydrate, and 0.25 M urea in 20 mL of deionized water.

## **Electrochemical measurements**

Electrochemical analysis was performed with a potentiostat (Autolab PGSTAT302N) and a conventional three-electrode configuration with Ni-Fe based catalyst on nickel foam as a working electrode, platinum mesh as a counter electrode, and saturated calomel electrode (SCE) as a reference electrode. The potential versus reversible hydrogen electrode ( $E_{\text{RHE}}$ ) is converted from potential versus SCE ( $E_{\text{SCE}}$ ) following the Nernst equation:

$$E_{\text{RHE}} = E_{\text{SCE}} + 0.059 \times (\text{pH}) + 0.242 \quad (1)$$

The linear sweep voltammetry (LSV) curves were obtained in  $\text{N}_2$  saturated 1 M KOH solution at 0.25  $\text{mV s}^{-1}$ . The stability of the catalysts was evaluated by chronopotentiometry analysis at 10  $\text{mA cm}^{-2}$  for 24 h. The electrochemical surface area (ECSA) was determined by measuring

the capacitive current associated with the double-layer charging from the scan rate dependence of cyclic voltammetry (CV). The CVs were recorded in the potential range between 1.3 and 1.4  $E_{\text{RHE}}$  at the scan rates with 5, 10, 25, 50, 100, 200, 400, 600, 800 and 1,000  $\text{mV s}^{-1}$ . The double-layer capacitance ( $C_{\text{dl}}$ ) was estimated by plotting the current density variation,  $\Delta J = (J_{\text{a}} - J_{\text{c}})$  at 1.35  $E_{\text{RHE}}$ . The linear slope is twice of the double-layer capacitance. The produced hydrogen and oxygen were sampled by a gas-tight syringe and measured by a gas chromatograph (GC) equipped with a thermal conduction detector (Shimadzu).

### Physical Characterizations:

Scanning electron microscopy (SEM) images were obtained with a FEI Quanta 650 SEM equipped with energy dispersive spectroscopy (EDX). Transmission electron microscopy (TEM) and high resolution TEM (HRTEM) images and element mapping analysis were conducted on a JEOL 2010F TEM. X-ray photoelectron spectroscopy (XPS) analysis was performed on a Kratos Axis Ultra DLD spectrometer with a monochromatic Al ( $K\alpha$ ) radiation source (1486.6 eV). X-ray diffraction (XRD) patterns were collected with a Rigaku MiniFlex 600 diffractometer operating with Cu  $K\alpha$  source, with a step size of  $0.05^\circ$  and a scan range between  $10^\circ$  and  $80^\circ$ .

$\text{N}_2$  adsorption-desorption isotherms and pore-size distributions were determined at 77 K with a Quantachrome AutoSorb iQ2 instrument. The specific surface area was calculated from  $\text{N}_2$  adsorption-desorption isotherm applying the Brunauer – Emmett – Teller (BET) model. The pore volume and pore size distribution were also calculated from the nitrogen isotherm using the Barrett – Joyner - Halenda (BJH) model.

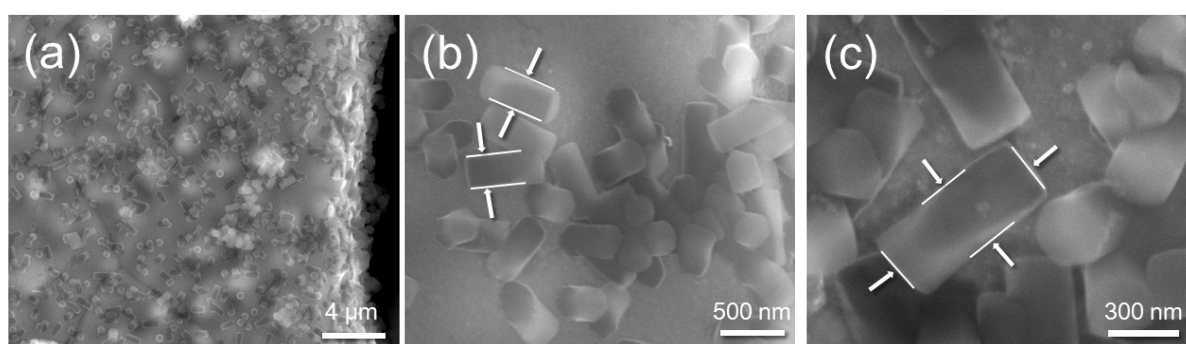

**Fig. S1** FE-SEM images of the NiFe MOF NRs converted from the NiFe NFs grown at 100  $^\circ\text{C}$  for 1 h. The areal density of the nanorods on nickel foam is lower than that on the counterpart converted from the NiFe NFs grown at 100  $^\circ\text{C}$  for 3 h, which is a typical

synthesis condition, while the shape and size of the MOF nanorods are identical.

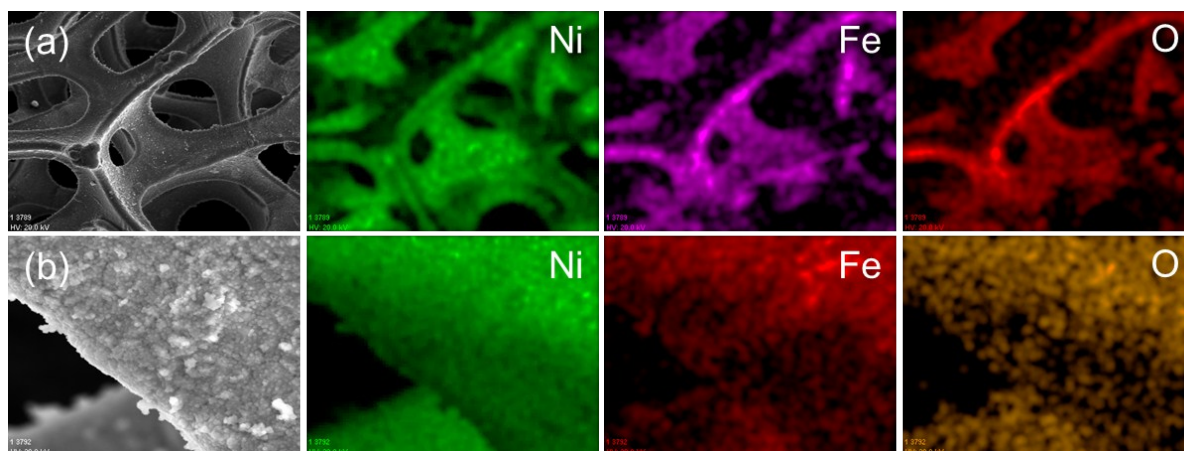

**Fig. S2** FE-SEM images of NiFe MOF NRs at (a) low- and (b) high-resolution and elemental mapping for Ni, Fe, and O.

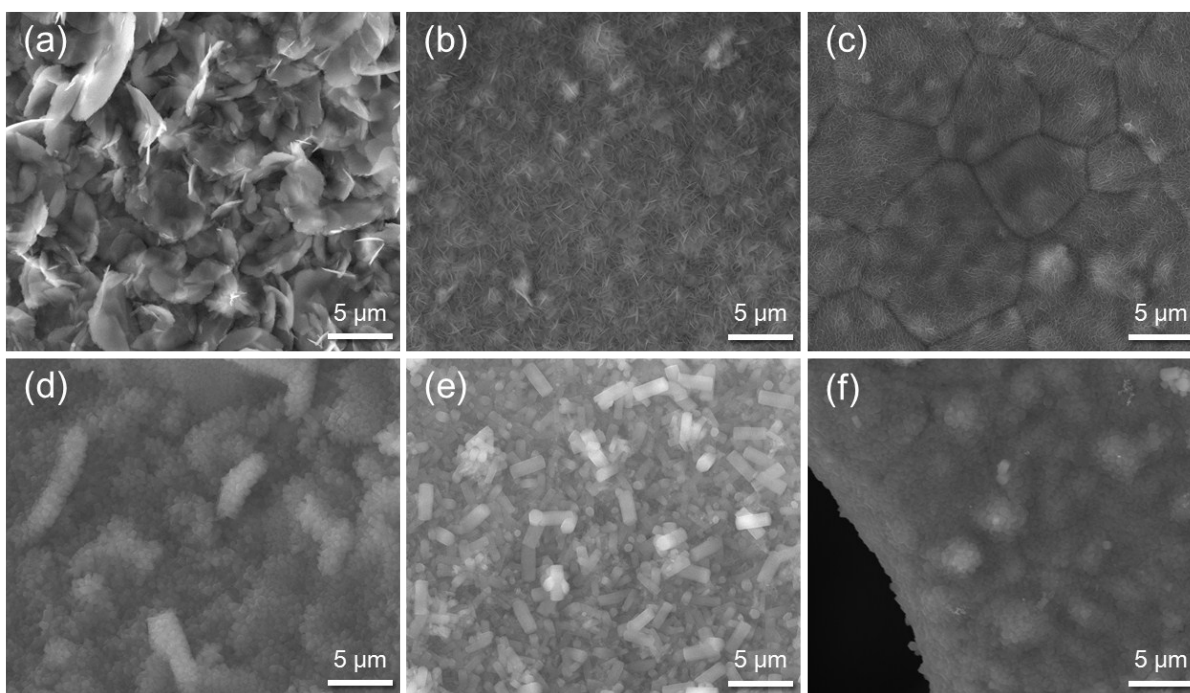

**Fig.S3** FE-SEM images of (a) micrometer-size  $\text{Ni}_{0.3}\text{Fe}_{0.7}$  hydroxide nanosheets, (b) nickel hydroxide nanoflakes, and (c)  $\text{Ni}_{0.7}\text{Co}_{0.3}$  hydroxide nanoflakes and the corresponding samples after MOF-treatment for (d) micrometer-size NiFe, (e) Ni, and (f) NiCo.

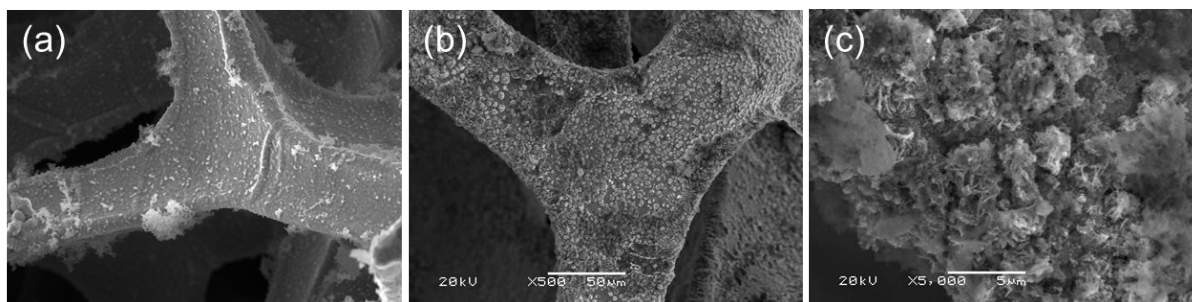

**Fig. S4** SEM image of (a) NiFe NFs, and (b) low-, and (c) high-resolution SEM images of Ni-Fe-P after phosphidation without MOF treatment.

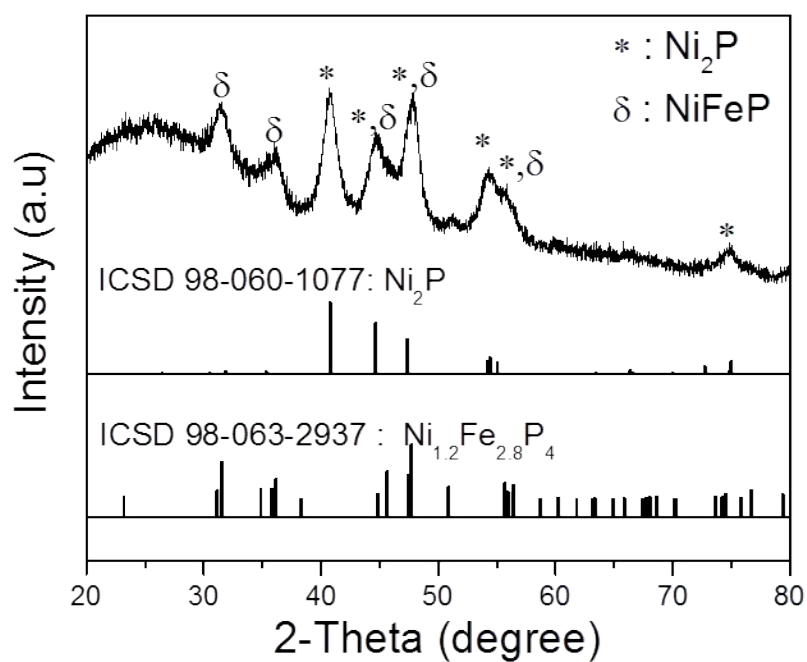

**Fig.S5** XRD patterns of porous Ni-Fe-P nanorods.

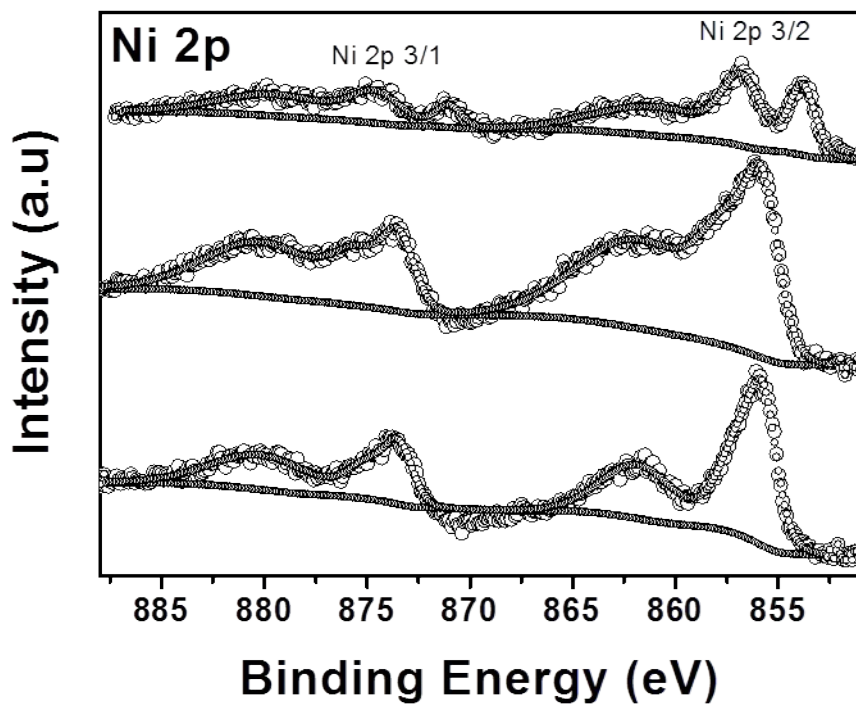

**Fig.S6** High resolution XPS Ni 2p spectra of Ni-Fe-P@C NRs.

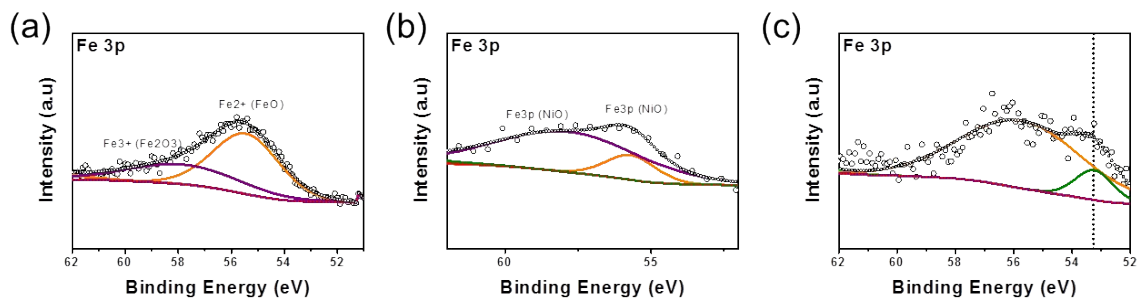

**Fig. S7** High resolution Fe 3p XPS spectra of (a) NiFe NFs, (b) Ni-Fe MOF NRs, and (c) porous Ni-Fe phosphide NRs.

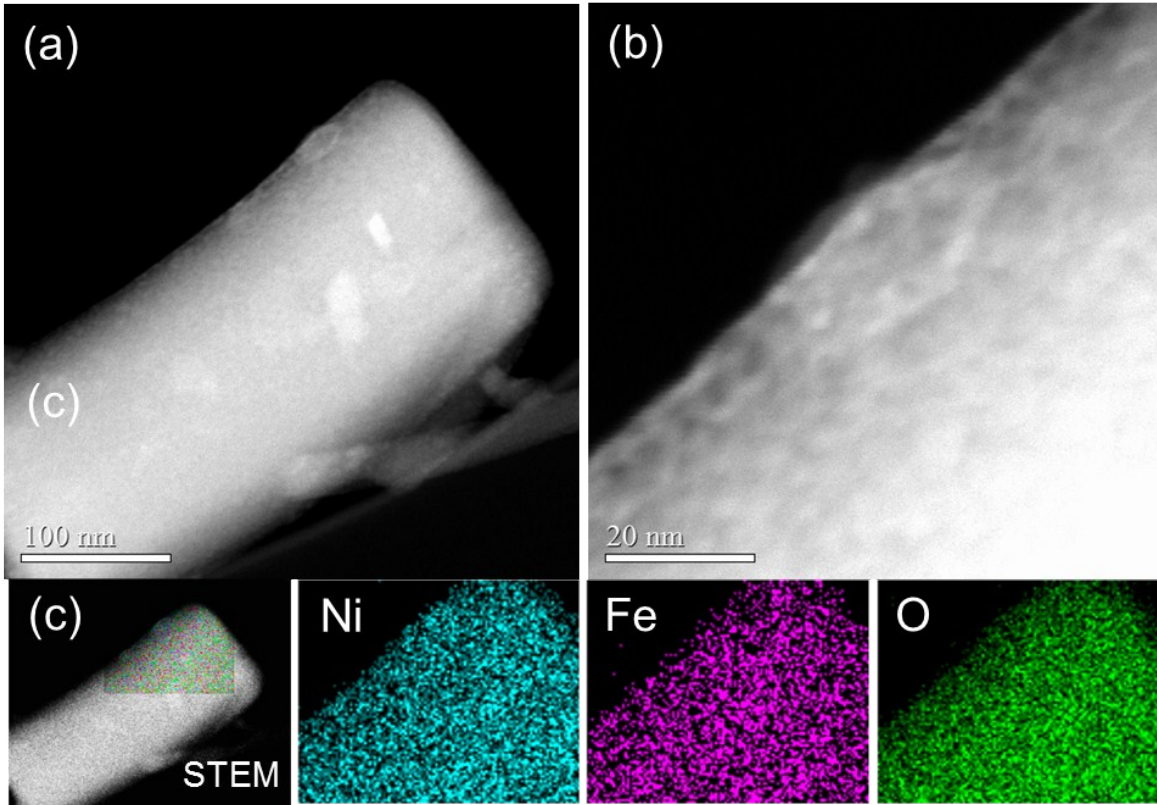

**Fig. S8** (a) Low-, and (b) high-resolution STEM images of Ni-Fe MOF nanorod and the corresponding EDX mappings for Ni, Fe and O.

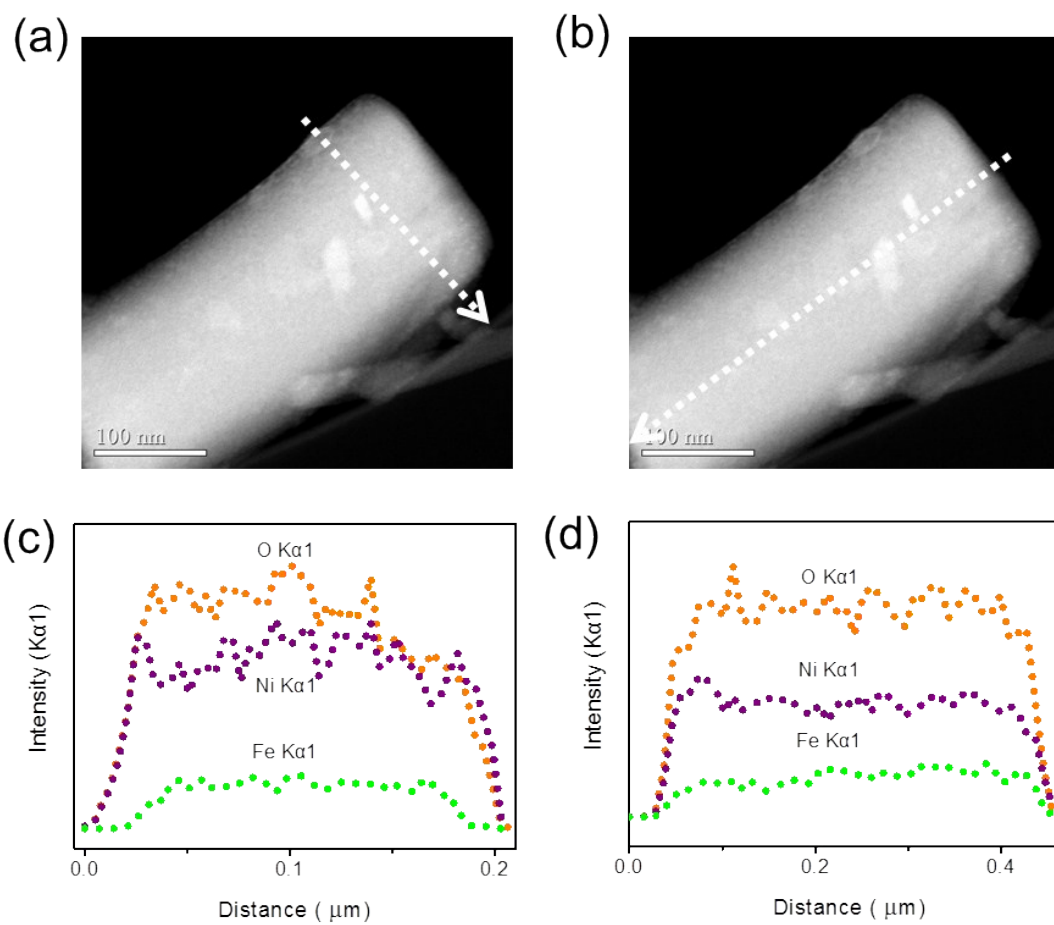

**Fig.S9** STEM images of Ni-Fe MOF nanorod and the corresponding EDX line scanning for Ni, Fe and O.



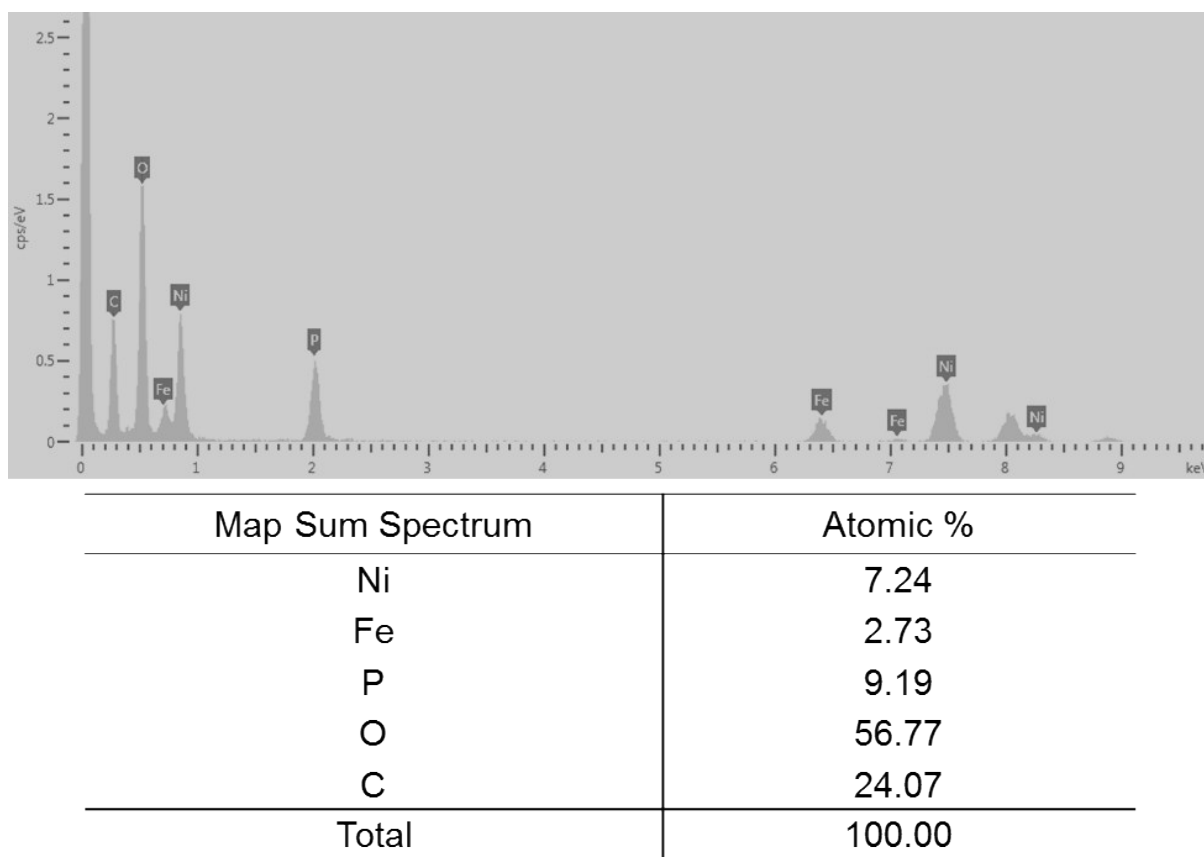

**Fig. S10** EDX spectrum of porous Ni-Fe-P nanorods.

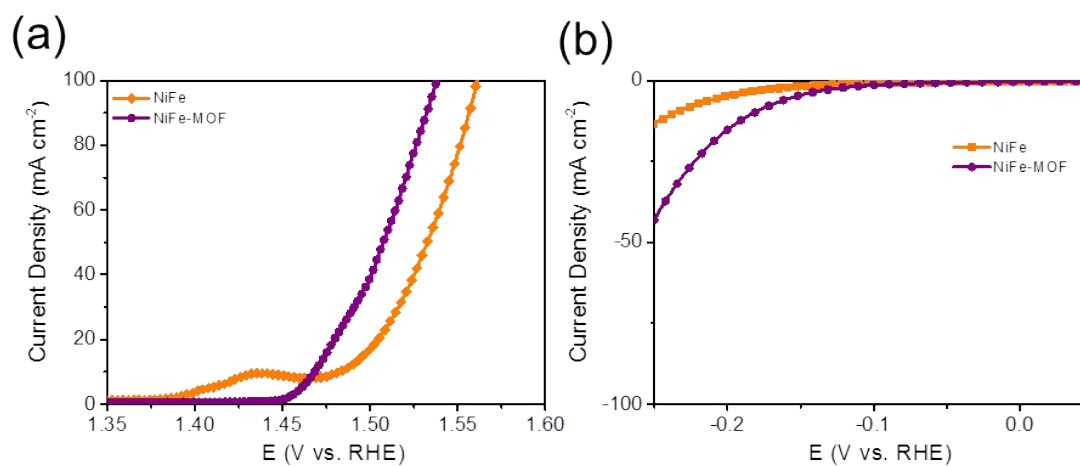

**Fig. S11** Linear sweep voltammetry (LSV) curves of MOF treated Ni-Fe nanorods toward (a) OER and (b) HER in  $N_2$ -saturated 1 M KOH solution at  $1 \text{ mV s}^{-1}$ .

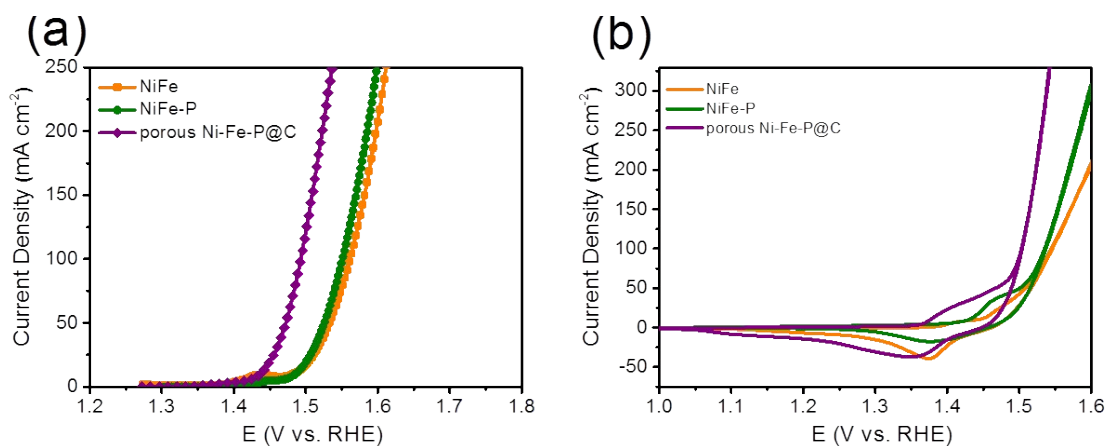

**Fig. S12** (a) LSV curves of NiFe NFs, Ni-Fe-P, and porous Ni-Fe-P@C NRs on nickel foam. (b) Cycling voltammetry (CV) with a potential sweep from 1 to 1.6 V vs. RHE at a scan rate of  $10 \text{ mV s}^{-1}$ .

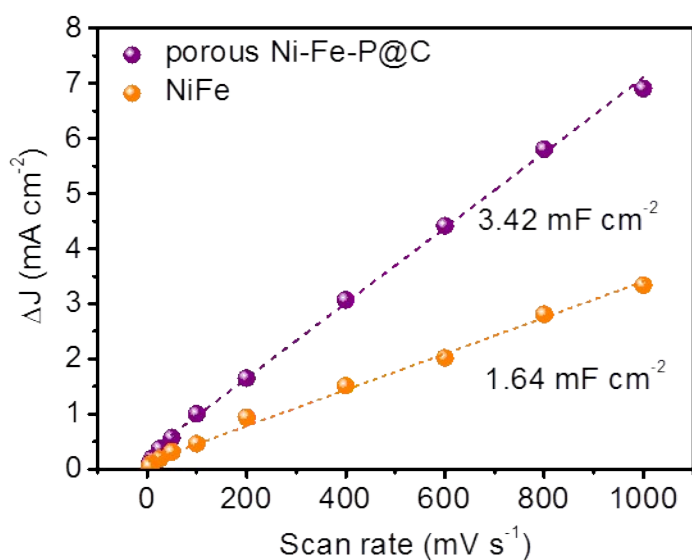

**Fig. S13** Capacitive  $J$  versus scan rate for NiFe and porous Ni-Fe-P@C NRs. The linear slope corresponds to twice of the double-layer capacitance ( $C_{dl}$ ).

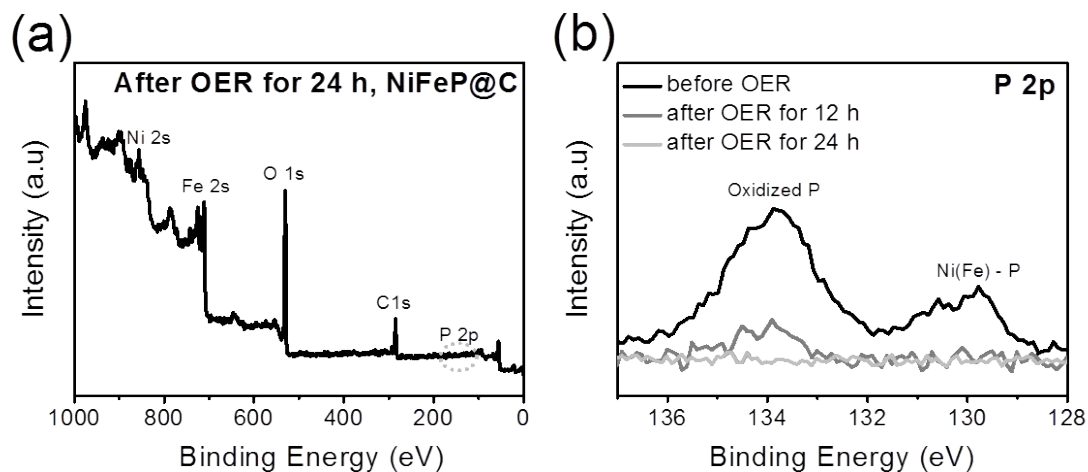

**Fig. S14** (a) Overall XPS analysis of Ni-Fe-P@C NRs after the oxygen evolution reaction at  $10 \text{ mA cm}^{-2}$  for 24 h, (b) P 2p spectrum of Ni-Fe-P@C before and after the oxygen evolution reaction at  $10 \text{ mA cm}^{-2}$  for 12 h and 24 h.

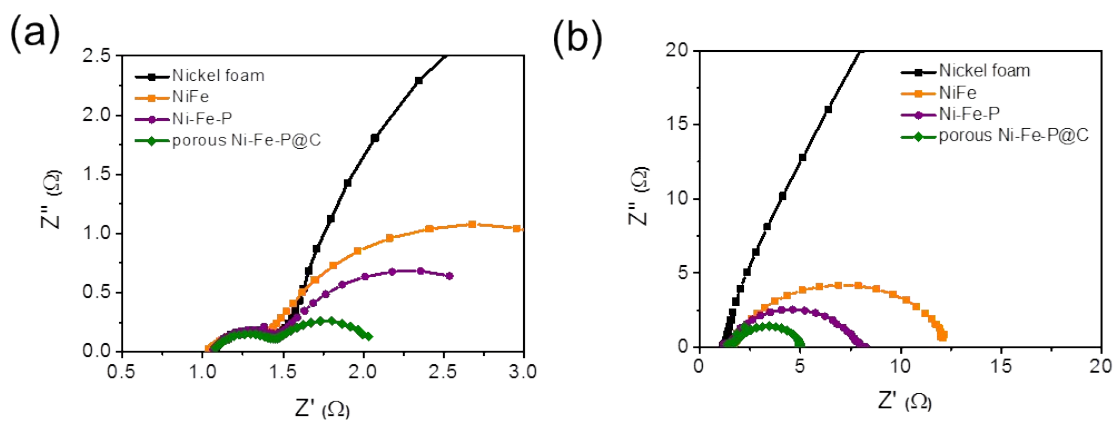

**Fig. S15** Nyquist plots obtained from the EIS analysis for the as-prepared catalyst in (a) HER region with an overpotential of 100 mV and (b) OER region with an overpotential of 250 mV in  $\text{N}_2$ -bubbled 1 M KOH solution.

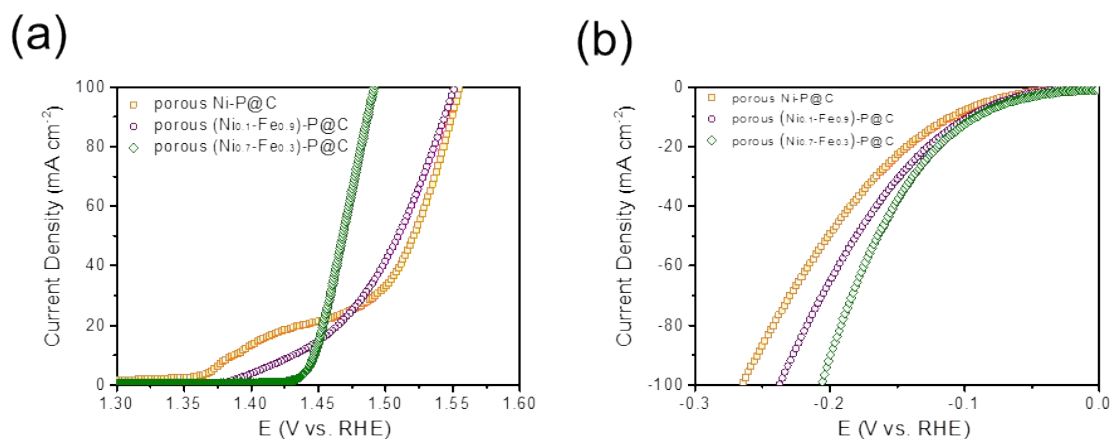

**Fig. S16** Linear sweep voltammetry (LSV) curves of the MOF-treated catalysts towards (a) OER and (b) HER in N<sub>2</sub>-saturated 1 M KOH solution at 1 mV s<sup>-1</sup>.

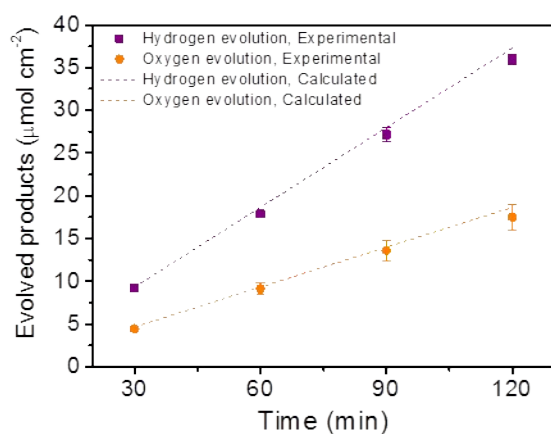

**Fig. S17.** The calculated and actual gas production by the overall water splitting with Ni-Fe-P@C as a bi-functional catalyst in 1 M KOH solution at 10 mA cm<sup>-2</sup> in a 2-electrode configuration.
